# Supplementary material
Source: HighWire-hosted journal article supplement (http://www.jneurosci.org/highwire/filestream/600207/field_highwire_adjunct_files/2/Figure_S3.pdf)

**A**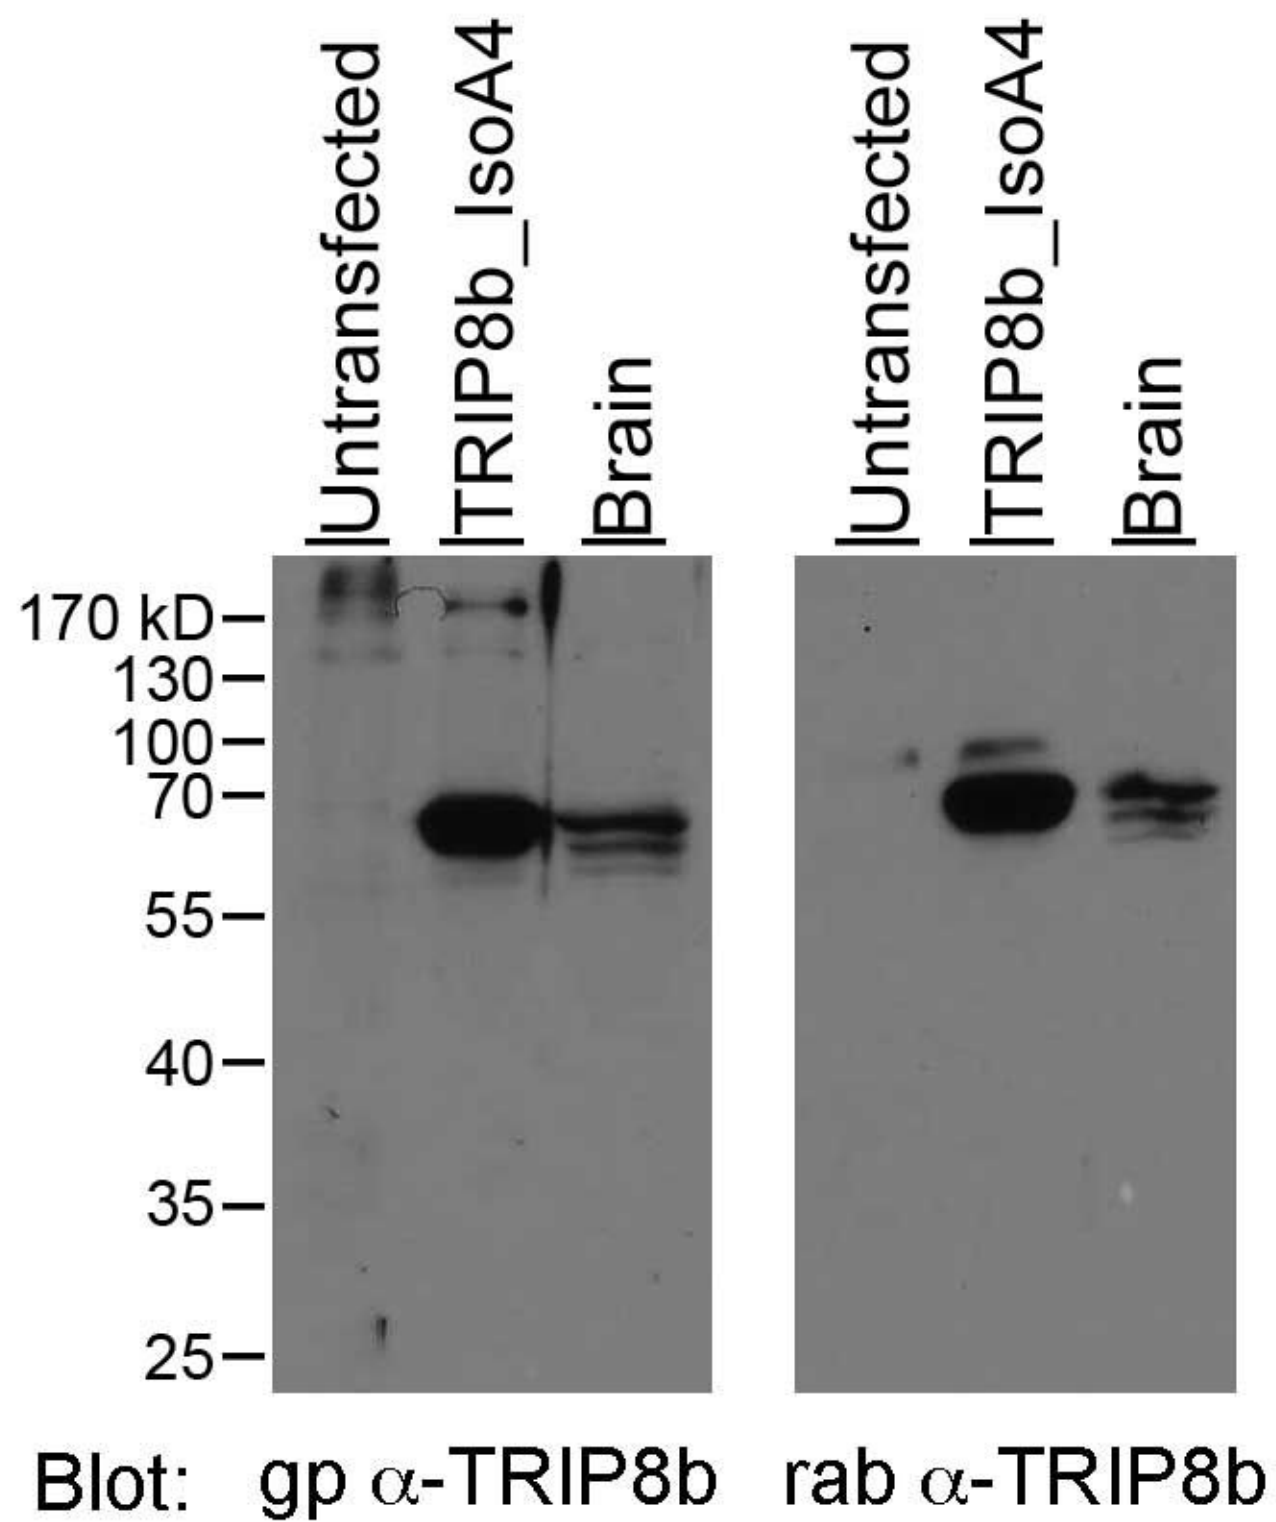**B**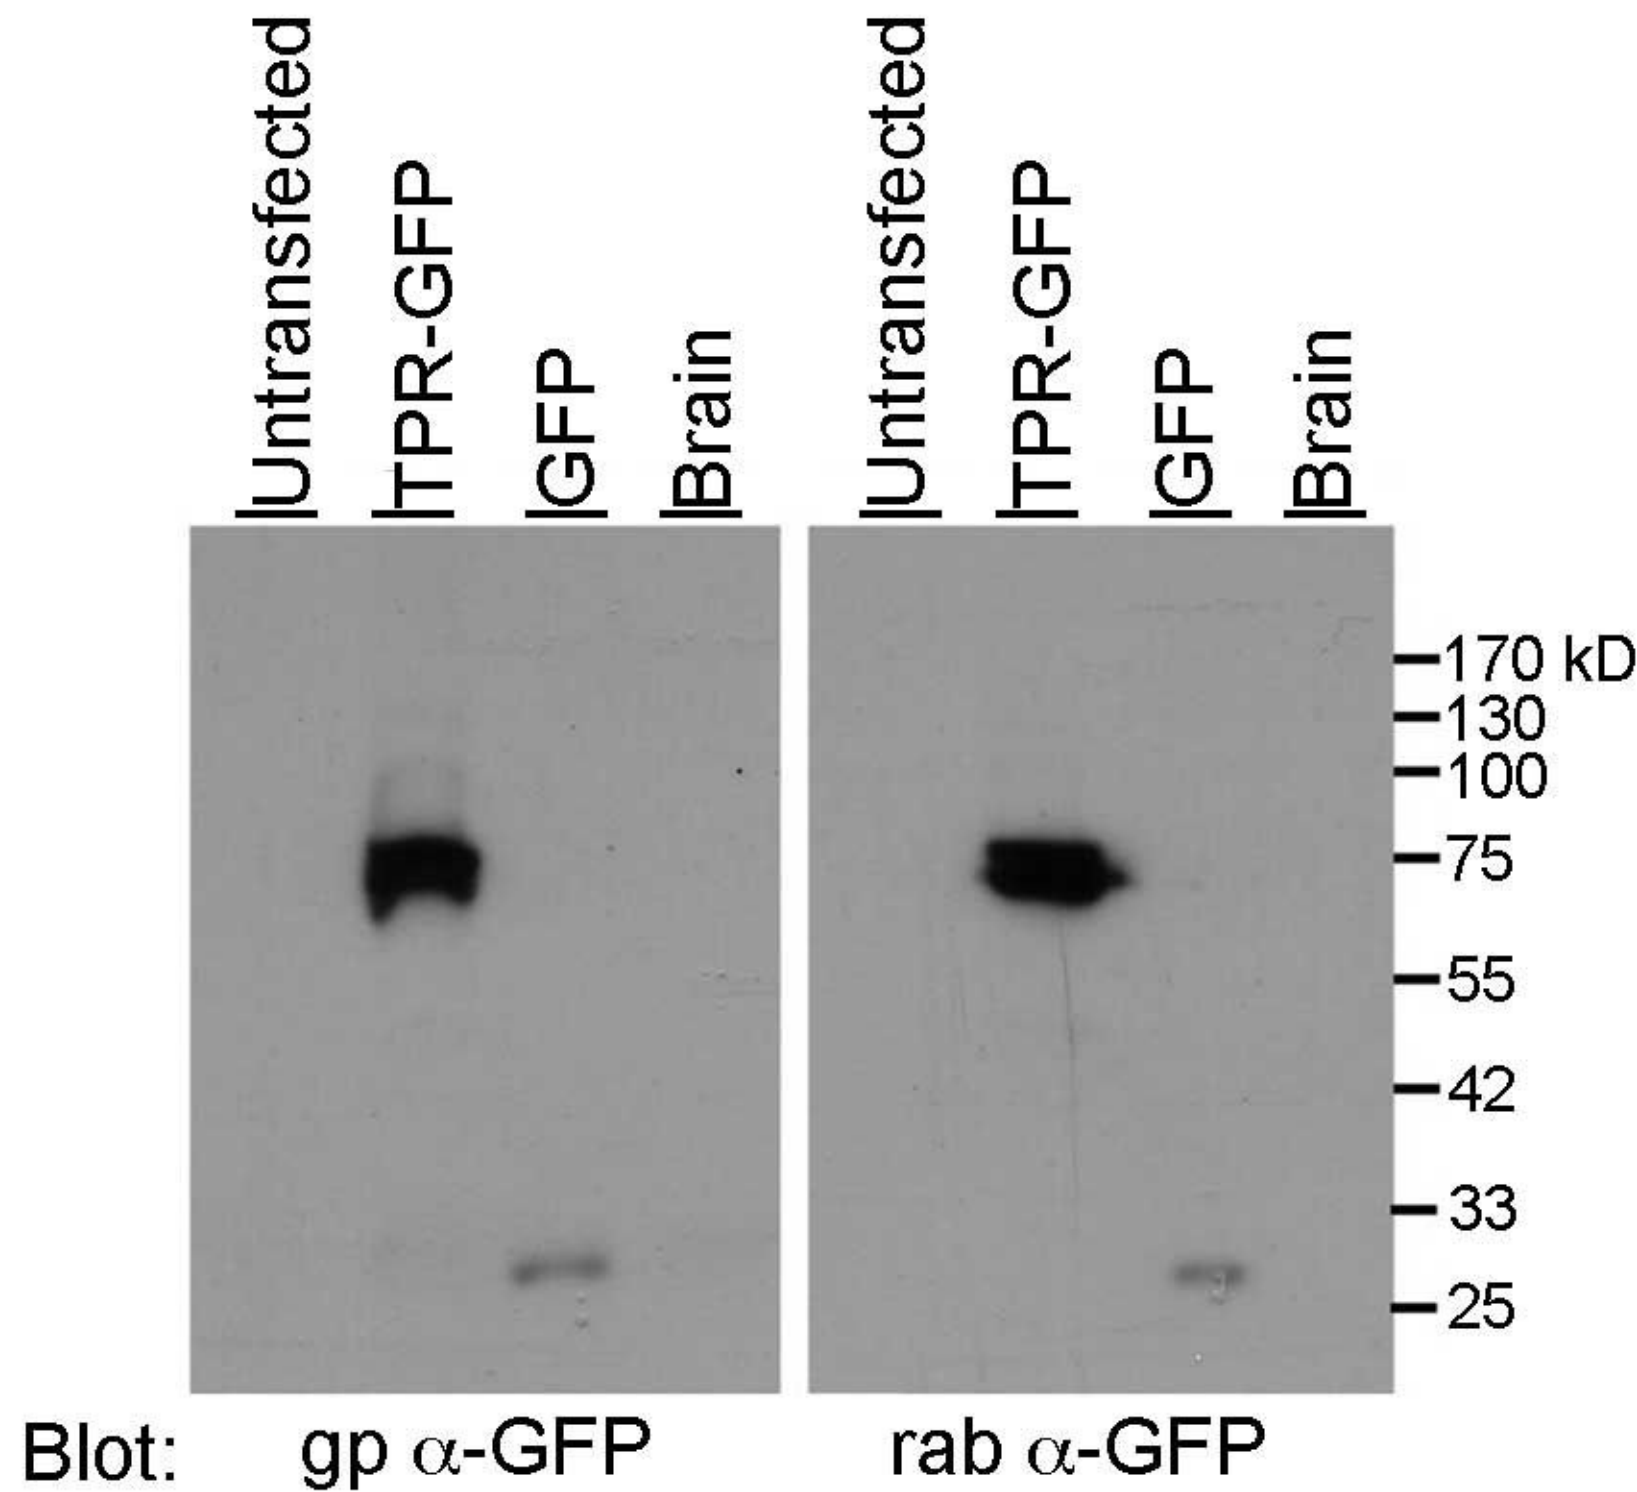

Supplement: Figure_S3.pdf [file Figure_S3.pdf]
